# Supplementary material for: Photochemical mechanism of 1,5-benzodiazepin-2-one: electronic structure calculations and nonadiabatic surface-hopping dynamics simulations
Source: Royal Society of Chemistry journal article supplement (doi:10.1039/c9cp00692c), 2019-01-01
Supplement: c9cp00692c1.pdf [file c9cp00692c1.pdf]

## **Supporting Information: Photochemical mechanism of 1,5-benzodiazepin-2-one: electronic structure calculations and nonadiabatic surface-hopping dynamics simulations**

Shu-Hua Xia<sup>a</sup>, Meng Che<sup>a</sup>, Yan Liu<sup>a</sup>, Yan Zhang<sup>\*a</sup> and Ganglong Cui<sup>\*b</sup>

<sup>a</sup> Center on Translational Neuroscience, College of Life and Environmental Science, Minzu University of China, Beijing 100081, China.

<sup>b</sup> Key Laboratory of Theoretical and Computational Photochemistry, Ministry of Education, College of Chemistry, Beijing Normal University, Beijing 100875, China.

### **Table of Contents**

1. OM2/MRCI Active Space
2. Optimized Structures of S0-ENOL-1 and S0-KETO-1
3. Optimization Path
4. Typical Trajectory of Type I
5. Cartesian Coordinates of All Optimized CASSCF Structures
6. Cartesian Coordinates of All Optimized OM2/MRCI Structures

## 1. OM2/MRCI Active Space

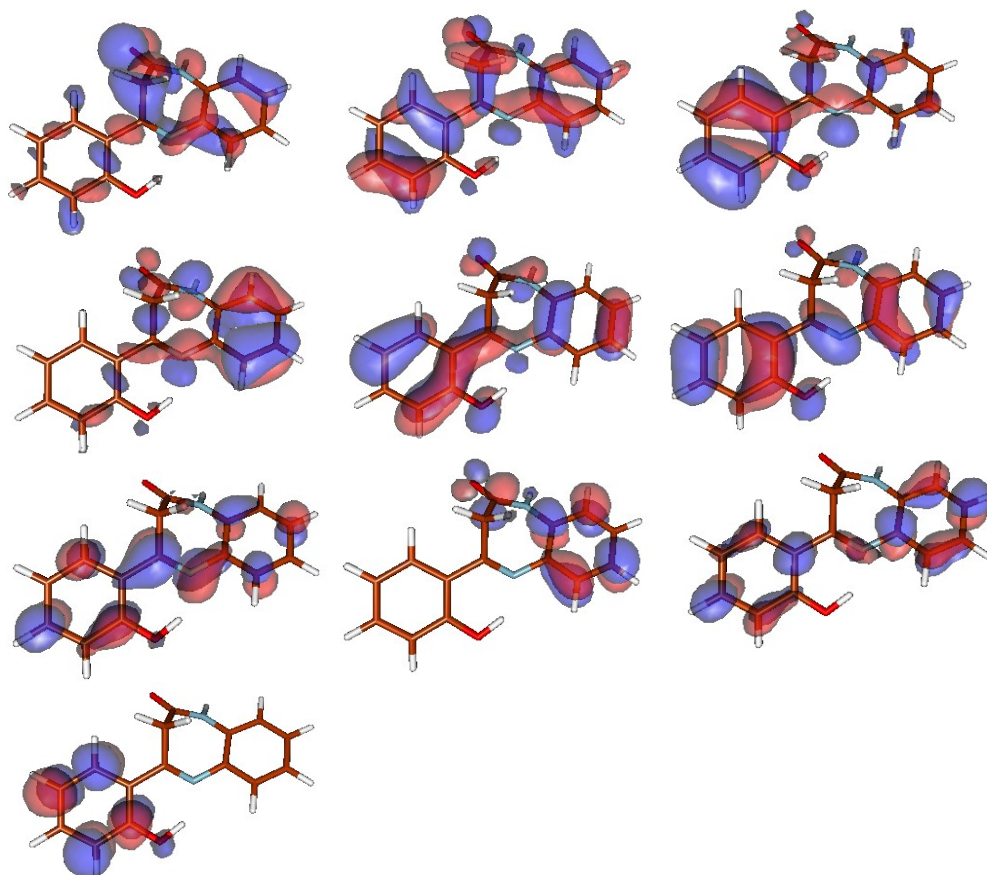

Fig. S1: The active space (12e,10o) of 1,5-benzodiazepin-2-one (enol form) used in the OM2/MRCI calculations. See text for simulation details.

## 2. Optimized Structures of S0-ENOL-1 and S0-KETO-1

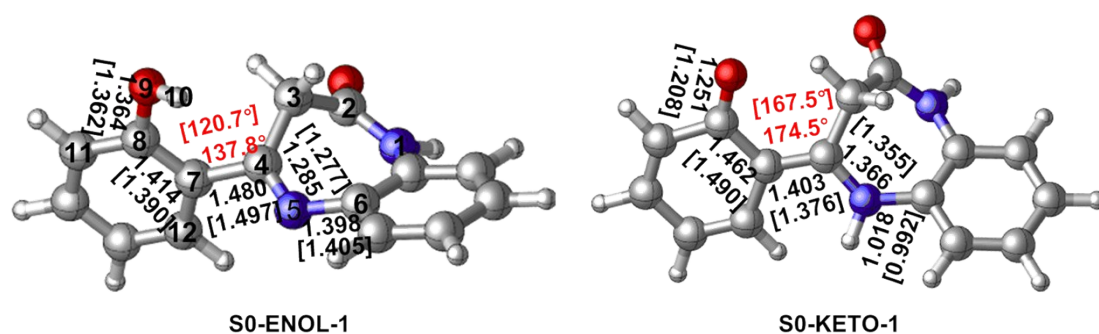

Fig. S2. Stationary points with atom labellings (blue represents nitrogen atom, red represents oxygen atom, grey represents carbon atom and light grey represents hydrogen atom) and selected geometric parameters obtained from OM2/MRCI and CASSCF (in brackets) methods.

### 3. Optimization Path

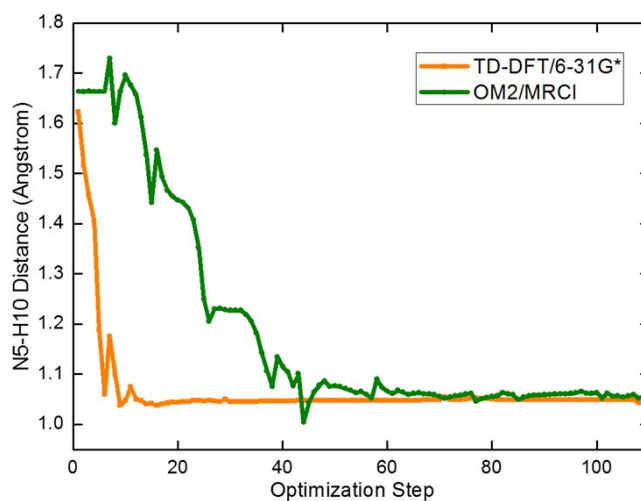

Fig. S3. TD-DFT/6-31G\* and OM2/MRCI optimization paths starting from the corresponding  $S_0$  enol minimum, which lead directly to keto species.

### 4. Typical Trajectory of Type I

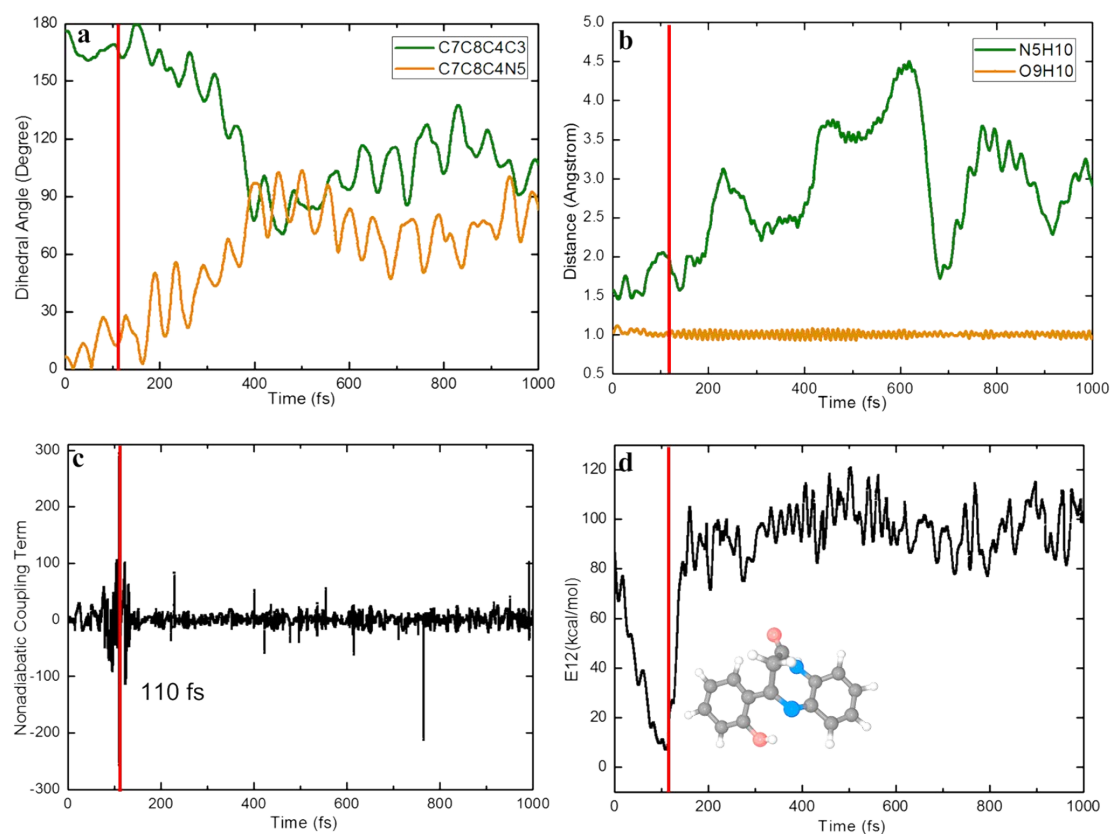

Fig. S4 Time evolution of several key geometric parameters and energy gap from a typical OM2/MRCI trajectory of type (II): (a) two key dihedral angles; (b) two important bond lengths; (c) nonadiabatic coupling term; and (d)  $S_1$ - $S_0$  energy gap.

As shows in Fig. S4, this typical trajectory hops to the ground state at 110 fs, and after the hopping point, the dihedrals of C7C8C4C3 and C7C8C4N5 rotate a little until the end of the simulation.

## 5. Cartesian Coordinates of All Optimized CASSCF Structures

### S0-ENOL

|   |          |           |           |
|---|----------|-----------|-----------|
| C | 4.322026 | 3.637048  | 0.182493  |
| C | 5.105226 | 3.794036  | -0.974016 |
| H | 5.014105 | 4.705122  | -1.538343 |
| C | 5.981430 | 2.806024  | -1.380595 |
| H | 6.571234 | 2.944452  | -2.268143 |
| C | 6.097345 | 1.632566  | -0.624742 |
| H | 6.776082 | 0.855851  | -0.925997 |
| C | 5.321358 | 1.473691  | 0.506504  |
| H | 5.376350 | 0.572269  | 1.088074  |
| C | 4.423881 | 2.473598  | 0.929667  |
| C | 3.287334 | 3.019767  | 2.915402  |
| C | 2.373797 | 2.628303  | 4.013064  |
| C | 2.137161 | 1.289951  | 4.319587  |
| C | 1.303672 | 0.951963  | 5.404659  |
| H | 1.166811 | -0.090597 | 5.621896  |
| C | 0.680379 | 1.934229  | 6.135819  |
| H | 0.037605 | 1.662861  | 6.953902  |
| C | 0.866957 | 3.289169  | 5.805051  |
| H | 0.357805 | 4.058826  | 6.354885  |
| C | 1.696960 | 3.614046  | 4.774876  |
| H | 1.811147 | 4.648635  | 4.513597  |
| C | 3.831184 | 4.436058  | 2.865110  |
| H | 3.680025 | 4.980880  | 3.779422  |
| H | 4.897896 | 4.376027  | 2.673583  |
| C | 3.162509 | 5.185661  | 1.735175  |
| N | 3.623333 | 2.166448  | 2.037771  |
| N | 3.419254 | 4.669571  | 0.502743  |
| H | 3.026385 | 5.191325  | -0.251182 |
| O | 2.665511 | 0.268229  | 3.653334  |
| H | 3.104573 | 0.599860  | 2.868556  |
| O | 2.449955 | 6.131842  | 1.900855  |

### S0-ENOL-1

|   |          |          |          |
|---|----------|----------|----------|
| C | 2.178673 | 1.233457 | 1.206117 |
| C | 3.515301 | 1.600099 | 1.288423 |
| H | 4.008150 | 1.543049 | 2.243218 |
| C | 4.216020 | 2.027474 | 0.175210 |
| H | 5.250235 | 2.303279 | 0.271115 |

|   |           |           |           |
|---|-----------|-----------|-----------|
| C | 3.575563  | 2.098425  | -1.062881 |
| H | 4.108720  | 2.432690  | -1.933793 |
| C | 2.235374  | 1.751541  | -1.155033 |
| H | 1.705506  | 1.830651  | -2.085813 |
| C | 1.522018  | 1.303520  | -0.033924 |
| C | -0.445758 | 0.079465  | 0.364228  |
| C | -1.919806 | -0.074704 | 0.150356  |
| C | -2.447878 | -1.248373 | -0.375791 |
| C | -3.816181 | -1.408705 | -0.513810 |
| H | -4.189162 | -2.328197 | -0.924713 |
| C | -4.667703 | -0.388122 | -0.132876 |
| H | -5.729929 | -0.517033 | -0.239220 |
| C | -4.158345 | 0.799612  | 0.368587  |
| H | -4.818678 | 1.597295  | 0.655579  |
| C | -2.790194 | 0.949742  | 0.502210  |
| H | -2.383115 | 1.863628  | 0.894511  |
| C | 0.242241  | -0.886239 | 1.320858  |
| H | -0.411689 | -1.696504 | 1.597404  |
| H | 1.130756  | -1.296842 | 0.848570  |
| C | 0.650894  | -0.164851 | 2.585559  |
| N | 0.159365  | 1.030245  | -0.237033 |
| N | 1.511235  | 0.876175  | 2.394250  |
| H | 1.830991  | 1.295207  | 3.240826  |
| O | -1.649473 | -2.285475 | -0.754109 |
| H | -0.863933 | -1.968973 | -1.178316 |
| O | 0.251247  | -0.458934 | 3.672628  |

S0-KETO

|   |          |           |           |
|---|----------|-----------|-----------|
| C | 4.338237 | 3.626903  | 0.152801  |
| C | 5.143502 | 3.751254  | -0.977318 |
| H | 5.053824 | 4.640644  | -1.575730 |
| C | 6.027705 | 2.761438  | -1.340965 |
| H | 6.628889 | 2.880127  | -2.223521 |
| C | 6.143607 | 1.612434  | -0.557761 |
| H | 6.833577 | 0.834969  | -0.828620 |
| C | 5.367534 | 1.481484  | 0.581557  |
| H | 5.445535 | 0.604796  | 1.198737  |
| C | 4.454526 | 2.480329  | 0.949661  |
| C | 3.210014 | 3.108654  | 2.984243  |
| C | 2.365381 | 2.700317  | 4.025168  |
| C | 2.035407 | 1.280215  | 4.183231  |
| C | 1.187457 | 0.925977  | 5.315324  |
| H | 0.965481 | -0.118519 | 5.430127  |
| C | 0.713799 | 1.856534  | 6.145801  |

|   |          |          |           |
|---|----------|----------|-----------|
| H | 0.085387 | 1.566945 | 6.970638  |
| C | 1.015241 | 3.263271 | 5.968029  |
| H | 0.590757 | 3.981289 | 6.645076  |
| C | 1.800404 | 3.650997 | 4.964103  |
| H | 1.988753 | 4.698325 | 4.832103  |
| C | 3.714455 | 4.523890 | 2.820189  |
| H | 3.508597 | 5.133833 | 3.678593  |
| H | 4.791316 | 4.485198 | 2.686742  |
| C | 3.082706 | 5.194804 | 1.618012  |
| N | 3.650071 | 2.236895 | 2.070237  |
| N | 3.390275 | 4.633534 | 0.415870  |
| H | 3.008610 | 5.118819 | -0.367655 |
| O | 2.446545 | 0.404822 | 3.424606  |
| H | 3.370834 | 1.283541 | 2.255546  |
| O | 2.359930 | 6.140982 | 1.709470  |

S0-KETO-1

|   |           |           |           |
|---|-----------|-----------|-----------|
| C | 2.519740  | 0.357805  | -0.345553 |
| C | 3.915034  | 0.408065  | -0.251146 |
| H | 4.421836  | 1.310131  | -0.544179 |
| C | 4.637088  | -0.687554 | 0.199824  |
| H | 5.708886  | -0.638566 | 0.253916  |
| C | 3.960859  | -1.839039 | 0.595750  |
| H | 4.506912  | -2.689546 | 0.960991  |
| C | 2.588332  | -1.884655 | 0.532938  |
| H | 2.063226  | -2.768370 | 0.851034  |
| C | 1.849945  | -0.802045 | 0.048777  |
| C | -0.516887 | -0.059383 | 0.232249  |
| C | -1.848992 | -0.346727 | 0.038177  |
| C | -2.944997 | 0.480154  | 0.616242  |
| C | -4.318181 | 0.014135  | 0.346917  |
| H | -5.090979 | 0.626455  | 0.772609  |
| C | -4.585513 | -1.084681 | -0.360295 |
| H | -5.603346 | -1.389781 | -0.528588 |
| C | -3.513972 | -1.874029 | -0.929287 |
| H | -3.755145 | -2.727043 | -1.536943 |
| C | -2.240520 | -1.523762 | -0.731637 |
| H | -1.482752 | -2.101862 | -1.227109 |
| C | 0.003293  | 1.255424  | 0.764231  |
| H | -0.800533 | 1.857458  | 1.135787  |
| H | 0.712901  | 1.059035  | 1.562984  |
| C | 0.691709  | 2.032218  | -0.347770 |
| N | 0.452762  | -0.951083 | -0.084734 |
| N | 1.824051  | 1.465260  | -0.861039 |

|   |           |           |           |
|---|-----------|-----------|-----------|
| H | 2.291220  | 2.034363  | -1.533702 |
| O | -2.787095 | 1.456213  | 1.310928  |
| H | 0.164733  | -1.880233 | -0.280494 |
| O | 0.278288  | 3.071898  | -0.761515 |

S1S0-ENOL

|   |           |           |           |
|---|-----------|-----------|-----------|
| C | 4.338720  | 3.891059  | 0.429873  |
| C | 3.951282  | 3.613887  | -0.877197 |
| H | 3.689598  | 4.428947  | -1.531740 |
| C | 3.896991  | 2.309206  | -1.334349 |
| H | 3.601087  | 2.111361  | -2.350315 |
| C | 4.203046  | 1.258735  | -0.477597 |
| H | 4.151768  | 0.242697  | -0.828899 |
| C | 4.568604  | 1.507821  | 0.853698  |
| H | 4.786623  | 0.690070  | 1.515831  |
| C | 4.648144  | 2.819050  | 1.307478  |
| C | 3.642856  | 3.588120  | 3.097021  |
| C | 2.808551  | 2.655391  | 3.895287  |
| C | 3.262547  | 1.427246  | 4.366914  |
| C | 2.402572  | 0.589449  | 5.078982  |
| H | 2.796510  | -0.341958 | 5.435854  |
| C | 1.099311  | 0.951973  | 5.315533  |
| H | 0.455388  | 0.287603  | 5.859271  |
| C | 0.622732  | 2.178215  | 4.864020  |
| H | -0.391741 | 2.473886  | 5.047970  |
| C | 1.470934  | 3.006043  | 4.178161  |
| H | 1.096602  | 3.941839  | 3.822290  |
| C | 3.386453  | 5.057226  | 3.109106  |
| H | 2.322813  | 5.245481  | 3.058748  |
| H | 3.725751  | 5.509210  | 4.032426  |
| C | 3.996022  | 5.863630  | 1.977360  |
| N | 4.955864  | 3.204536  | 2.656014  |
| N | 4.433854  | 5.241298  | 0.845051  |
| H | 4.678691  | 5.904548  | 0.138506  |
| O | 4.509530  | 0.957223  | 4.197472  |
| H | 5.129748  | 1.656555  | 4.028127  |
| O | 4.045230  | 7.058297  | 2.070279  |

S1S0-ENOL-1

|   |          |          |           |
|---|----------|----------|-----------|
| C | 4.497048 | 3.569225 | 0.360223  |
| C | 4.778977 | 2.805355 | -0.754466 |
| H | 4.409747 | 3.120847 | -1.716059 |
| C | 5.534069 | 1.634996 | -0.652415 |
| H | 5.742913 | 1.059112 | -1.537089 |

|   |           |          |           |
|---|-----------|----------|-----------|
| C | 6.002089  | 1.220518 | 0.584862  |
| H | 6.588283  | 0.322765 | 0.672591  |
| C | 5.709907  | 1.974010 | 1.733917  |
| H | 6.075413  | 1.663435 | 2.695946  |
| C | 4.955987  | 3.131921 | 1.627846  |
| C | 3.175403  | 3.818773 | 2.843481  |
| C | 2.620323  | 2.917195 | 3.883848  |
| C | 1.269412  | 2.501969 | 3.882036  |
| C | 0.789716  | 1.657959 | 4.862824  |
| H | -0.241442 | 1.350442 | 4.838709  |
| C | 1.629840  | 1.201259 | 5.865994  |
| H | 1.244078  | 0.549530 | 6.627618  |
| C | 2.952808  | 1.583793 | 5.879194  |
| H | 3.610771  | 1.243301 | 6.656926  |
| C | 3.435928  | 2.435822 | 4.889868  |
| H | 4.456326  | 2.757280 | 4.932002  |
| C | 2.434343  | 4.992522 | 2.292804  |
| H | 1.376919  | 4.793561 | 2.237419  |
| H | 2.557869  | 5.849258 | 2.947534  |
| C | 2.855934  | 5.456537 | 0.911371  |
| N | 4.581604  | 3.919536 | 2.747764  |
| N | 3.799385  | 4.783711 | 0.180900  |
| H | 3.867284  | 5.176825 | -0.734775 |
| O | 0.472105  | 2.911119 | 2.869464  |
| H | -0.386823 | 2.520956 | 2.946282  |
| O | 2.330860  | 6.424733 | 0.435396  |

#### S1S0-KETO

|   |           |          |           |
|---|-----------|----------|-----------|
| C | 4.375884  | 3.416122 | 0.023774  |
| C | 5.404925  | 3.658543 | -0.874063 |
| H | 5.252284  | 4.385609 | -1.648307 |
| C | 6.598675  | 2.967062 | -0.785892 |
| H | 7.376000  | 3.160749 | -1.499115 |
| C | 6.799482  | 2.042863 | 0.227508  |
| H | 7.728949  | 1.515025 | 0.312600  |
| C | 5.791712  | 1.816493 | 1.136493  |
| H | 5.916150  | 1.121509 | 1.943808  |
| C | 4.582643  | 2.486371 | 1.039746  |
| C | 3.002872  | 3.065833 | 2.800585  |
| C | 2.217022  | 2.635604 | 3.957541  |
| C | 0.786897  | 2.298389 | 3.905075  |
| C | 0.160905  | 2.011616 | 5.219001  |
| H | -0.894931 | 1.781996 | 5.206468  |
| C | 0.882075  | 2.040045 | 6.387944  |



|   |          |          |           |
|---|----------|----------|-----------|
| H | 0.381283 | 1.825833 | 7.322288  |
| C | 2.288366 | 2.349344 | 6.398332  |
| H | 2.839410 | 2.367962 | 7.330068  |
| C | 2.913073 | 2.638847 | 5.186659  |
| H | 3.966775 | 2.902424 | 5.150725  |
| C | 3.017143 | 4.452023 | 2.257896  |
| H | 2.514716 | 5.125673 | 2.916669  |
| H | 4.046810 | 4.764966 | 2.144866  |
| C | 2.325708 | 4.474999 | 0.908528  |
| N | 3.537390 | 2.154097 | 1.924878  |
| N | 3.136147 | 4.061588 | -0.122299 |
| H | 2.708061 | 4.053427 | -1.020113 |
| O | 0.164159 | 2.252452 | 2.867895  |
| H | 3.531138 | 1.219156 | 2.216334  |
| O | 1.217566 | 4.861090 | 0.737122  |

S1S0-KETO-1

|   |           |           |           |
|---|-----------|-----------|-----------|
| C | 2.420061  | 0.343709  | -0.015526 |
| C | 3.793852  | 0.368178  | -0.126177 |
| H | 4.294952  | 1.313942  | -0.151463 |
| C | 4.521181  | -0.817053 | -0.262288 |
| H | 5.583445  | -0.768262 | -0.382079 |
| C | 3.882163  | -2.027722 | -0.203663 |
| H | 4.432114  | -2.943908 | -0.264555 |
| C | 2.499981  | -2.059025 | -0.082870 |
| H | 1.966929  | -2.985768 | -0.037664 |
| C | 1.765036  | -0.902944 | -0.014149 |
| C | -0.516866 | -0.415941 | 0.788541  |
| C | -1.937706 | -0.344187 | 0.384155  |
| C | -2.937358 | -1.289206 | 0.895500  |
| C | -4.317941 | -1.075624 | 0.381275  |
| H | -5.086391 | -1.747105 | 0.745484  |
| C | -4.600082 | -0.065779 | -0.500590 |
| H | -5.620457 | 0.063628  | -0.843236 |
| C | -3.562535 | 0.839278  | -0.991704 |
| H | -3.809141 | 1.612883  | -1.718317 |
| C | -2.292550 | 0.679829  | -0.544468 |
| H | -1.487727 | 1.308916  | -0.911811 |
| C | 0.148122  | 0.631986  | 1.609470  |
| H | -0.496085 | 0.982105  | 2.381143  |
| H | 1.018739  | 0.170951  | 2.051760  |
| C | 0.547617  | 1.785154  | 0.726782  |
| N | 0.366776  | -0.981617 | -0.106667 |
| N | 1.675542  | 1.540069  | -0.007737 |

|   |           |           |           |
|---|-----------|-----------|-----------|
| H | 1.965321  | 2.273930  | -0.610747 |
| O | -2.666158 | -2.155638 | 1.704986  |
| H | 0.053226  | -1.776801 | -0.571125 |
| O | -0.056625 | 2.806820  | 0.645390  |

## 6. Cartesian Coordinates of All Optimized OM2/MRCI Structures

### S0-ENOL

|   |          |           |           |
|---|----------|-----------|-----------|
| C | 4.306366 | 3.622233  | 0.147513  |
| C | 5.107826 | 3.780534  | -0.992940 |
| H | 4.998664 | 4.672000  | -1.617027 |
| C | 6.021046 | 2.789809  | -1.353469 |
| H | 6.592354 | 2.898609  | -2.278766 |
| C | 6.153300 | 1.656805  | -0.553327 |
| H | 6.900329 | 0.898840  | -0.825125 |
| C | 5.367441 | 1.458914  | 0.562054  |
| H | 5.454017 | 0.566749  | 1.184299  |
| C | 4.428966 | 2.451244  | 0.943586  |
| C | 3.289525 | 3.078415  | 2.926885  |
| C | 2.385759 | 2.696083  | 4.024910  |
| C | 2.118120 | 1.326085  | 4.264930  |
| C | 1.279388 | 0.924037  | 5.323058  |
| H | 1.114092 | -0.138562 | 5.489981  |
| C | 0.701342 | 1.897199  | 6.127768  |
| H | 0.073094 | 1.597007  | 6.974701  |
| C | 0.913483 | 3.256569  | 5.867787  |
| H | 0.399532 | 4.010382  | 6.469902  |
| C | 1.757101 | 3.657064  | 4.836903  |
| H | 1.892960 | 4.724310  | 4.635746  |
| C | 3.854232 | 4.485477  | 2.856168  |
| H | 3.671860 | 5.056410  | 3.777777  |
| H | 4.937948 | 4.423213  | 2.653755  |
| C | 3.121106 | 5.135987  | 1.705378  |
| N | 3.634192 | 2.181612  | 2.058724  |
| N | 3.358023 | 4.613976  | 0.444561  |
| H | 2.953348 | 5.118511  | -0.337474 |
| O | 2.624843 | 0.313904  | 3.533083  |
| H | 3.077787 | 0.675484  | 2.707372  |
| O | 2.317014 | 6.064668  | 1.861590  |

### S0-ENOL-1

|   |          |          |          |
|---|----------|----------|----------|
| C | 2.185132 | 1.211885 | 1.243515 |
| C | 3.553180 | 1.545505 | 1.323171 |
| H | 4.078031 | 1.438623 | 2.277428 |

|   |           |           |           |
|---|-----------|-----------|-----------|
| C | 4.220185  | 2.011482  | 0.198037  |
| H | 5.286738  | 2.253400  | 0.260588  |
| C | 3.538570  | 2.185396  | -1.007106 |
| H | 4.073197  | 2.563664  | -1.884335 |
| C | 2.184628  | 1.885430  | -1.100671 |
| H | 1.638100  | 2.027418  | -2.036191 |
| C | 1.485775  | 1.390618  | 0.020784  |
| C | -0.438886 | 0.093549  | 0.353694  |
| C | -1.897591 | -0.076263 | 0.173933  |
| C | -2.470987 | -1.330085 | -0.140758 |
| C | -3.858887 | -1.493772 | -0.264208 |
| H | -4.265055 | -2.479206 | -0.484793 |
| C | -4.676508 | -0.385416 | -0.069348 |
| H | -5.763645 | -0.493572 | -0.149132 |
| C | -4.121736 | 0.872385  | 0.200987  |
| H | -4.781244 | 1.735633  | 0.329766  |
| C | -2.744412 | 1.033960  | 0.309246  |
| H | -2.310478 | 2.016271  | 0.513077  |
| C | 0.273937  | -0.927162 | 1.204938  |
| H | -0.357249 | -1.795457 | 1.440094  |
| H | 1.212276  | -1.245688 | 0.708109  |
| C | 0.603188  | -0.201830 | 2.500830  |
| N | 0.123353  | 1.130230  | -0.155798 |
| N | 1.516066  | 0.831693  | 2.416560  |
| H | 1.805997  | 1.263852  | 3.288196  |
| O | -1.725352 | -2.460316 | -0.301405 |
| H | -0.907417 | -2.233973 | -0.817872 |
| O | 0.063926  | -0.481553 | 3.576421  |

#### S0-KETO

|   |          |          |           |
|---|----------|----------|-----------|
| C | 4.210531 | 3.254293 | 0.336359  |
| C | 5.047005 | 3.426287 | -0.769548 |
| H | 4.963332 | 4.332291 | -1.376609 |
| C | 5.945968 | 2.418091 | -1.135685 |
| H | 6.559265 | 2.551695 | -2.033038 |
| C | 6.033641 | 1.250828 | -0.386267 |
| H | 6.735577 | 0.464533 | -0.679627 |
| C | 5.241063 | 1.069863 | 0.732490  |
| H | 5.310942 | 0.160748 | 1.334419  |
| C | 4.309268 | 2.072769 | 1.114215  |
| C | 3.147013 | 2.743100 | 3.163179  |
| C | 2.280571 | 2.372115 | 4.214046  |
| C | 1.908587 | 0.966541 | 4.348750  |
| C | 1.056131 | 0.589991 | 5.458022  |

|   |           |           |           |
|---|-----------|-----------|-----------|
| H | 0.794041  | -0.465463 | 5.539171  |
| C | 0.622157  | 1.526462  | 6.342914  |
| H | -0.033004 | 1.248889  | 7.179651  |
| C | 0.986390  | 2.897676  | 6.203612  |
| H | 0.583607  | 3.623648  | 6.914801  |
| C | 1.809517  | 3.306022  | 5.183518  |
| H | 2.081183  | 4.366921  | 5.099953  |
| C | 3.737836  | 4.122656  | 3.029443  |
| H | 3.587124  | 4.727702  | 3.936904  |
| H | 4.814394  | 4.037196  | 2.803415  |
| C | 3.012549  | 4.785405  | 1.865705  |
| N | 3.535536  | 1.820859  | 2.247124  |
| N | 3.254481  | 4.255092  | 0.614718  |
| H | 2.853551  | 4.744512  | -0.178759 |
| O | 2.320650  | 0.109032  | 3.521561  |
| H | 3.226271  | 0.831289  | 2.434274  |
| O | 2.300224  | 5.786295  | 2.015554  |

S0-KETO-1

|   |           |           |           |
|---|-----------|-----------|-----------|
| C | 5.622189  | 4.453738  | 1.484214  |
| C | 6.383602  | 5.098822  | 0.487728  |
| H | 7.350563  | 4.677939  | 0.197574  |
| C | 5.925035  | 6.274100  | -0.096440 |
| H | 6.529672  | 6.773214  | -0.859005 |
| C | 4.693659  | 6.812007  | 0.280903  |
| H | 4.334572  | 7.733659  | -0.187348 |
| C | 3.914766  | 6.183644  | 1.247834  |
| H | 2.954707  | 6.613062  | 1.550405  |
| C | 4.373215  | 5.007782  | 1.870901  |
| C | 3.257351  | 3.128597  | 3.030276  |
| C | 2.399081  | 2.681247  | 4.045497  |
| C | 1.977800  | 1.281431  | 4.085710  |
| C | 1.067459  | 0.884285  | 5.160301  |
| H | 0.781017  | -0.169214 | 5.181093  |
| C | 0.626363  | 1.777262  | 6.074880  |
| H | -0.056778 | 1.476213  | 6.881914  |
| C | 1.035560  | 3.144892  | 6.022035  |
| H | 0.659516  | 3.837426  | 6.779129  |
| C | 1.889374  | 3.578251  | 5.038810  |
| H | 2.185128  | 4.641836  | 5.031692  |
| C | 3.866418  | 2.190844  | 2.023775  |
| H | 3.434053  | 1.184544  | 2.140653  |
| H | 3.718137  | 2.589405  | 1.000436  |
| C | 5.354147  | 2.145642  | 2.337843  |

|   |          |          |          |
|---|----------|----------|----------|
| N | 3.583595 | 4.448515 | 2.895669 |
| N | 6.112538 | 3.280505 | 2.060886 |
| H | 7.118501 | 3.195019 | 2.162911 |
| O | 2.330470 | 0.446779 | 3.223590 |
| H | 3.121469 | 5.124604 | 3.500699 |
| O | 5.925609 | 1.145274 | 2.775610 |

S1S0-ENOL

|   |           |           |           |
|---|-----------|-----------|-----------|
| C | 3.764501  | 3.465315  | 0.617328  |
| C | 3.464215  | 3.088232  | -0.711760 |
| H | 2.721226  | 3.663404  | -1.277142 |
| C | 4.087894  | 2.002468  | -1.302716 |
| H | 3.828652  | 1.719014  | -2.328390 |
| C | 5.072677  | 1.281927  | -0.613303 |
| H | 5.583121  | 0.452179  | -1.109096 |
| C | 5.374402  | 1.606998  | 0.690372  |
| H | 6.122646  | 1.043838  | 1.256090  |
| C | 4.703006  | 2.670638  | 1.367629  |
| C | 4.069569  | 3.572310  | 3.377784  |
| C | 2.914409  | 2.885695  | 3.932044  |
| C | 2.973250  | 1.486356  | 4.171867  |
| C | 1.907527  | 0.802460  | 4.790859  |
| H | 2.000229  | -0.265504 | 4.975946  |
| C | 0.770232  | 1.519280  | 5.142364  |
| H | -0.076728 | 0.999490  | 5.605886  |
| C | 0.691435  | 2.900248  | 4.912042  |
| H | -0.214971 | 3.444513  | 5.191679  |
| C | 1.745264  | 3.579137  | 4.311051  |
| H | 1.657088  | 4.652885  | 4.119230  |
| C | 4.177287  | 5.050383  | 3.381027  |
| H | 3.740376  | 5.534715  | 4.271807  |
| H | 5.227345  | 5.376791  | 3.255604  |
| C | 3.394646  | 5.495453  | 2.155101  |
| N | 4.998418  | 2.881660  | 2.666775  |
| N | 3.219571  | 4.683101  | 1.034777  |
| H | 2.621167  | 5.128484  | 0.334156  |
| O | 4.030979  | 0.706898  | 3.852196  |
| H | 4.818051  | 1.273274  | 3.606460  |
| O | 2.886269  | 6.623248  | 2.100581  |

S1S0-ENOL-1

|   |          |          |           |
|---|----------|----------|-----------|
| C | 3.975727 | 3.190771 | 0.890875  |
| C | 4.287342 | 2.573249 | -0.332543 |
| H | 3.573317 | 2.623432 | -1.163200 |

|   |           |           |           |
|---|-----------|-----------|-----------|
| C | 5.485042  | 1.888112  | -0.505755 |
| H | 5.694889  | 1.384479  | -1.455901 |
| C | 6.440642  | 1.855522  | 0.521922  |
| H | 7.396800  | 1.354403  | 0.351284  |
| C | 6.157246  | 2.431705  | 1.738024  |
| H | 6.872701  | 2.401613  | 2.565129  |
| C | 4.907382  | 3.078179  | 1.978208  |
| C | 3.371936  | 3.770423  | 3.544870  |
| C | 2.566820  | 2.676342  | 4.052162  |
| C | 1.157181  | 2.759956  | 4.214652  |
| C | 0.399823  | 1.688152  | 4.708741  |
| H | -0.684672 | 1.782418  | 4.806899  |
| C | 1.047961  | 0.507683  | 5.061800  |
| H | 0.470834  | -0.330629 | 5.463994  |
| C | 2.435567  | 0.398241  | 4.909136  |
| H | 2.932889  | -0.535179 | 5.187917  |
| C | 3.183632  | 1.465272  | 4.421810  |
| H | 4.268836  | 1.373370  | 4.329842  |
| C | 2.812706  | 5.113715  | 3.224687  |
| H | 1.941582  | 5.398757  | 3.833544  |
| H | 3.594203  | 5.896444  | 3.281602  |
| C | 2.360329  | 4.993905  | 1.774849  |
| N | 4.665297  | 3.559245  | 3.218663  |
| N | 2.845592  | 4.024208  | 0.893144  |
| H | 2.366907  | 4.060435  | -0.010467 |
| O | 0.572120  | 3.932656  | 3.860213  |
| H | -0.415671 | 3.862744  | 3.960684  |
| O | 1.561293  | 5.818716  | 1.305318  |

#### S1S0-KETO

|   |          |          |           |
|---|----------|----------|-----------|
| C | 4.192258 | 3.168250 | 0.188366  |
| C | 4.858445 | 3.270235 | -1.049280 |
| H | 4.351703 | 3.765857 | -1.883474 |
| C | 6.120287 | 2.722567 | -1.222022 |
| H | 6.614109 | 2.792211 | -2.196143 |
| C | 6.762718 | 2.085258 | -0.157730 |
| H | 7.761017 | 1.659528 | -0.298842 |
| C | 6.137642 | 1.983437 | 1.075708  |
| H | 6.634727 | 1.481325 | 1.911978  |
| C | 4.842602 | 2.502230 | 1.261274  |
| C | 3.500440 | 3.272704 | 3.171557  |
| C | 2.500276 | 2.813358 | 4.139086  |
| C | 1.211979 | 2.363122 | 3.610753  |
| C | 0.204168 | 1.971224 | 4.578243  |

|   |           |          |           |
|---|-----------|----------|-----------|
| H | -0.778430 | 1.694511 | 4.195635  |
| C | 0.485783  | 2.000568 | 5.923639  |
| H | -0.283669 | 1.726282 | 6.656072  |
| C | 1.754986  | 2.395760 | 6.393561  |
| H | 1.950653  | 2.399952 | 7.472109  |
| C | 2.755521  | 2.796211 | 5.509381  |
| H | 3.739890  | 3.088197 | 5.889519  |
| C | 3.375341  | 4.631481 | 2.579751  |
| H | 2.906765  | 5.325333 | 3.298873  |
| H | 4.367058  | 5.013597 | 2.261410  |
| C | 2.465904  | 4.512227 | 1.358989  |
| N | 4.230200  | 2.329329 | 2.514433  |
| N | 2.917873  | 3.729733 | 0.306782  |
| H | 2.292259  | 3.640111 | -0.488153 |
| O | 1.039931  | 2.271613 | 2.379451  |
| H | 4.270809  | 1.394079 | 2.914663  |
| O | 1.386047  | 5.107420 | 1.277428  |

S1S0-KETO-1

|   |           |           |           |
|---|-----------|-----------|-----------|
| C | 2.516080  | 0.340631  | 0.000012  |
| C | 3.911441  | 0.226659  | 0.138627  |
| H | 4.505890  | 1.134162  | 0.287963  |
| C | 4.535059  | -1.009038 | 0.055425  |
| H | 5.621906  | -1.081697 | 0.162090  |
| C | 3.777710  | -2.165639 | -0.153389 |
| H | 4.274799  | -3.138825 | -0.211105 |
| C | 2.400005  | -2.085613 | -0.279885 |
| H | 1.804271  | -2.990476 | -0.438182 |
| C | 1.750688  | -0.836868 | -0.218770 |
| C | -0.489654 | -0.005093 | 0.308396  |
| C | -1.924257 | -0.132297 | 0.077989  |
| C | -2.667856 | -1.151681 | 0.815031  |
| C | -4.103078 | -1.204487 | 0.600188  |
| H | -4.671697 | -1.953503 | 1.152782  |
| C | -4.710302 | -0.322856 | -0.272607 |
| H | -5.797081 | -0.354919 | -0.418815 |
| C | -3.957990 | 0.636010  | -0.978342 |
| H | -4.471676 | 1.325087  | -1.656434 |
| C | -2.579463 | 0.727471  | -0.817405 |
| H | -2.006085 | 1.481725  | -1.362976 |
| C | 0.034183  | 0.800717  | 1.442674  |
| H | -0.787041 | 1.210385  | 2.054515  |
| H | 0.721368  | 0.195746  | 2.070940  |
| C | 0.788240  | 1.940973  | 0.782701  |

|   |           |           |           |
|---|-----------|-----------|-----------|
| N | 0.360173  | -0.800862 | -0.405589 |
| N | 1.928532  | 1.609173  | 0.051508  |
| H | 2.493257  | 2.386394  | -0.276641 |
| O | -2.080523 | -1.955730 | 1.564186  |
| H | -0.047109 | -1.580108 | -0.924361 |
| O | 0.417651  | 3.119356  | 0.817120  |
